# Supplementary figures and images for: QTL Mapping of Fiber Quality and Yield-Related Traits in an Intra-Specific Upland Cotton Using Genotype by Sequencing (GBS)
Source: MDPI journal article supplement (doi:10.3390/ijms19020441), 2018-02-01

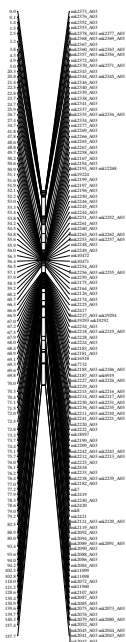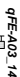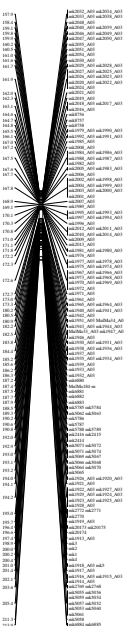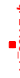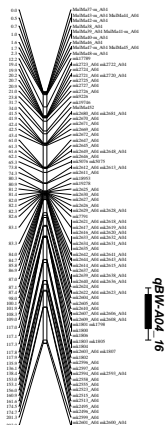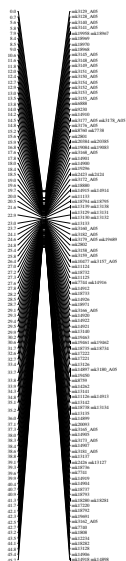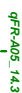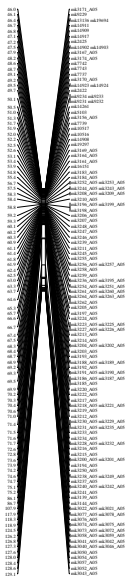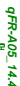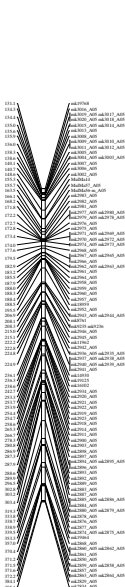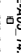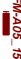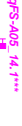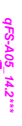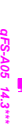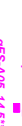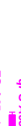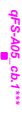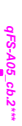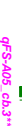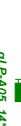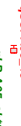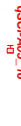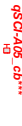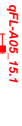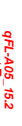

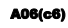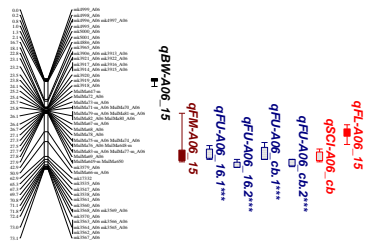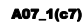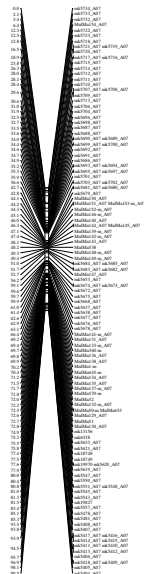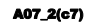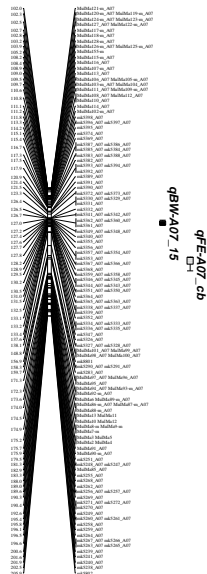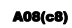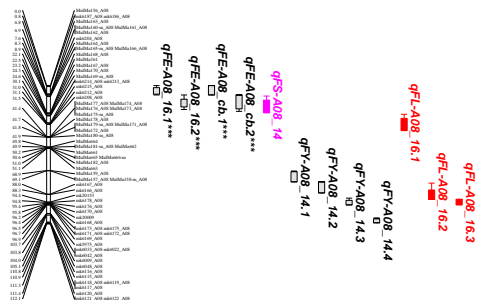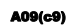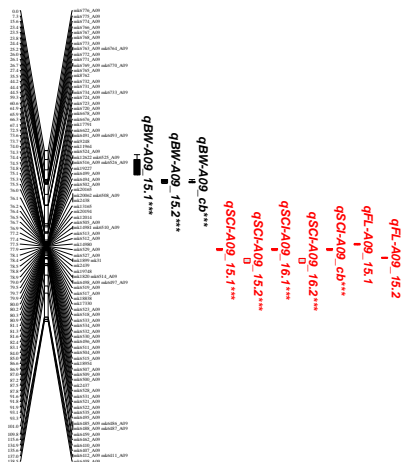

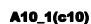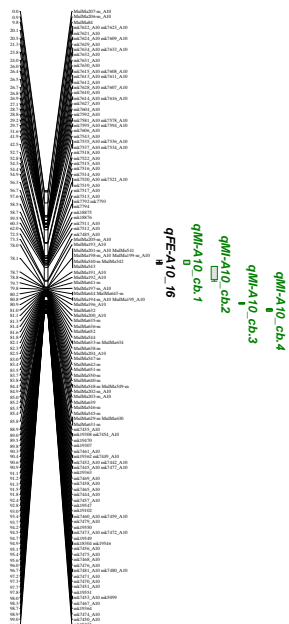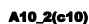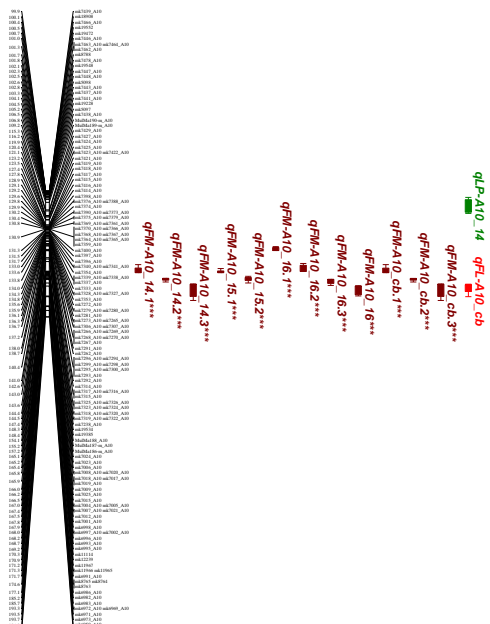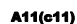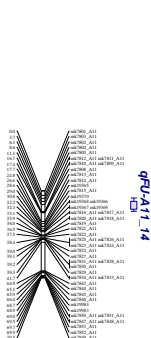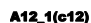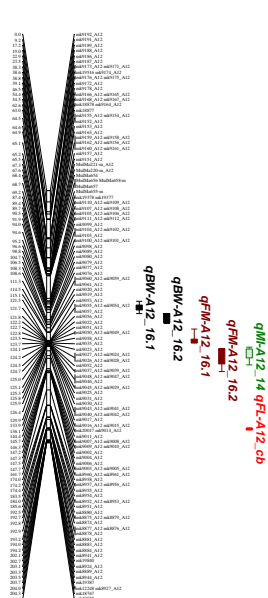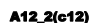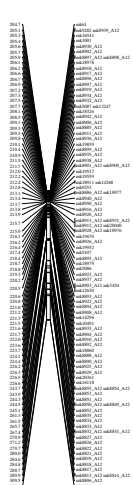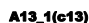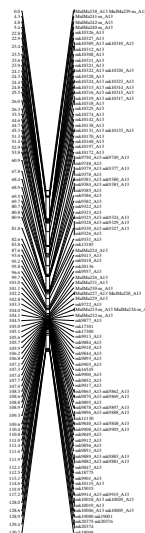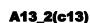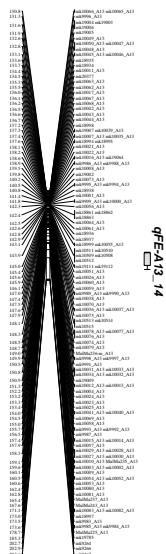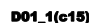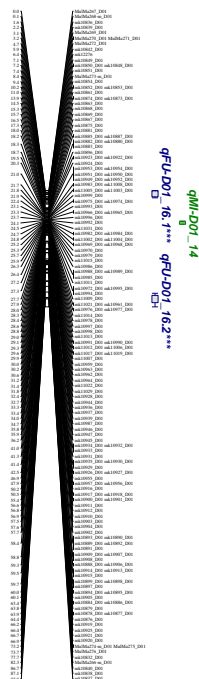



**D04(c22)**

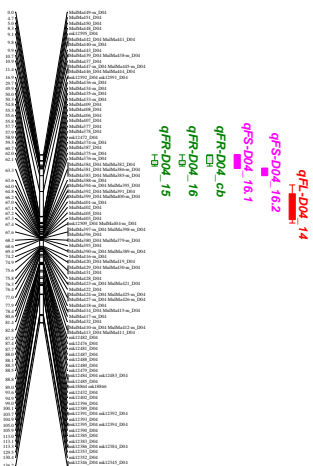

**D05\_1(c19)**

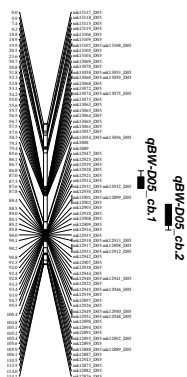

**D05\_2(c19)**

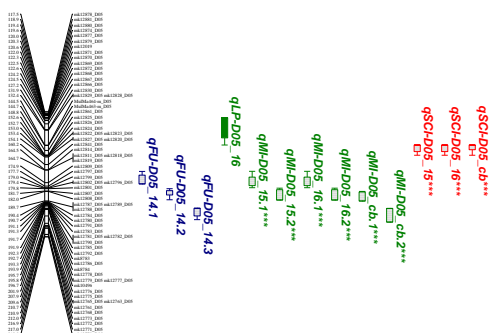

**D06(c25)**

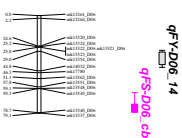

**D07\_1(c16)**

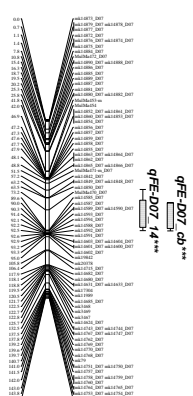

**D07\_2(c16)**

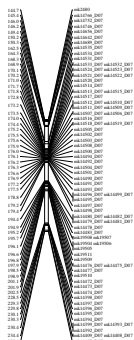

**D08(c24)**

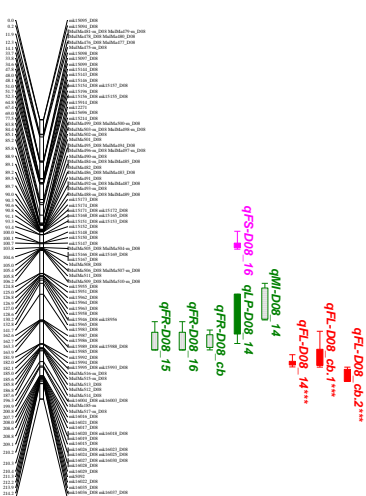

Supplement: s1 [file s1]
